# Supplementary material for: Magnetic colloidal superparticles of Co, Mn and Ni ferrite featured with comb-type and/or linear amphiphilic polyelectrolytes; NMR and MRI relaxometry
Source: Royal Society of Chemistry journal article supplement (doi:10.1039/c5dt00372e), 2015-01-01
Supplement: c5dt00372e1.pdf [file c5dt00372e1.pdf]

## Electronic Supporting Information (ESI)

# “Magnetic colloidal superparticles of Co, Mn and Ni ferrite featured with comb-type and/or linear amphiphilic polyelectrolytes; NMR and MRI relaxometry”

Melita Menelaou, Zacharoula Iatridi, Ioannis Tsougos, Katerina Vasiou, Catherine

Dendrinou-Samara and Georgios Bokias

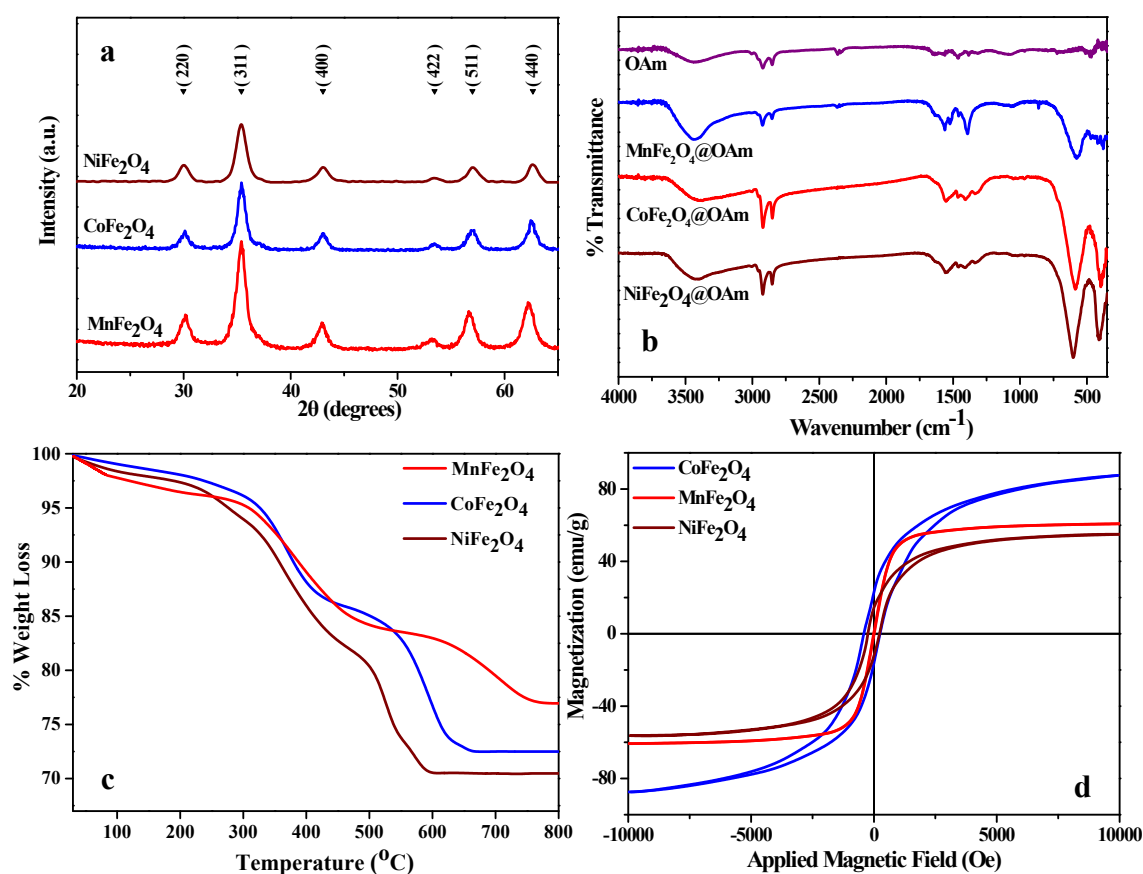

**Fig. S1.** (a) X-ray diffraction patterns of the MF<sub>2</sub>O<sub>4</sub> nanoparticles; (b) FT-IR spectra of OAm ligand and OAm-capped MF<sub>2</sub>O<sub>4</sub> nanoparticles; (c) Thermogravimetric curves of the MF<sub>2</sub>O<sub>4</sub> nanoparticles and (d) VSM measurements at 300K on the effective mass of the MF<sub>2</sub>O<sub>4</sub> nanoparticles (where M=Co, Mn, Ni).
